# Supplementary material for: Aggregative processes in aqueous solutions of mono- to tetra-ethylene glycol dimethyl ether at 298.15 K
Source: Royal Society of Chemistry journal article supplement (doi:10.1039/b315286c), 2004-01-01
Supplement: b315286c.pdf [file b315286c.pdf]

## Electronic Supplementary Information

### Aggregative processes in aqueous solutions of mono- to tetra- ethylene glycol dimethyl ether at 298.15 K

**G rard Douh ret,<sup>\*a</sup> Jo o Carlos R. Reis,<sup>b</sup> Michael I. Davis,<sup>c</sup> Inger Johanne Fjellanger,<sup>d,e</sup> and Harald H iland<sup>d,f</sup>**

<sup>a</sup> *Laboratoire de Thermodynamique des Solutions et des Polym res,*

*Universit  Blaise Pascal, F-63177 Aubi re C dex, France.*

*E-mail: Gerard.Douheret@univ-bpclermont.fr*

<sup>b</sup> *Departamento de Qu mica e Bioqu mica, Centro de Electroqu mica e Cin tica,*

*Faculdade de Ci ncias, Universidade de Lisboa, P-1749-016 Lisboa, Portugal.*

*E-mail: jcreis@fc.ul.pt*

<sup>c</sup> *Department of Chemistry, University of Texas at El Paso,*

*El Paso, Texas, 79968-0513, USA.*

*E-mail: mdavis@miners.utep.edu*

<sup>d</sup> *Department of Chemistry, University of Bergen, N-5007 Bergen, Norway.*

<sup>e</sup> *E-mail: Inger.Fjellanger@kj.uib.no*

<sup>f</sup> *E-mail: Harald.H iland@kj.uib.no*

**Table S1** Experimental values of density,  $\rho$ , for  $x_A$  monoglyme +  $(1 - x_A)$  water at 298.15 K

| $x_A$   | $\rho/\text{kg m}^{-3}$ | $x_A$   | $\rho/\text{kg m}^{-3}$ |
|---------|-------------------------|---------|-------------------------|
| 0       | 997.0474                | 0.28000 | 940.498                 |
| 0.01495 | 993.493                 | 0.31990 | 932.519                 |
| 0.03000 | 991.109                 | 0.35999 | 924.968                 |
| 0.04494 | 989.208                 | 0.40024 | 918.096                 |
| 0.06003 | 987.382                 | 0.45008 | 910.492                 |
| 0.07002 | 986.024                 | 0.50027 | 903.590                 |
| 0.07999 | 984.590                 | 0.55970 | 896.266                 |
| 0.09023 | 983.060                 | 0.61995 | 889.847                 |
| 0.10000 | 981.329                 | 0.67999 | 884.039                 |
| 0.11497 | 978.508                 | 0.73932 | 878.968                 |
| 0.13002 | 975.422                 | 0.80056 | 874.075                 |
| 0.15003 | 970.976                 | 0.86016 | 869.783                 |
| 0.17999 | 963.976                 | 0.91059 | 866.516                 |
| 0.21275 | 955.979                 | 0.94988 | 864.154                 |
| 0.23986 | 949.608                 | 1       | 861.351                 |

**Table S2** Experimental values of  $V_m^E$ ,  $u$ ,  $K_{S,m} = -(\partial V_m/\partial p)_S$  and of the excess molar quantity  $K_{S,m}^E$  for  $x_A$  monoglyme + (1 -  $x_A$ ) water at 298.15 K

| $x_A$   | $V_m^E/\text{cm}^3 \text{ mol}^{-1}$ | $u/\text{m s}^{-1}$ | $K_{S,m}/\text{m}^3 \text{ PPa}^{-1} \text{ mol}^{-1}$ | $K_{S,m}^E/\text{m}^3 \text{ PPa}^{-1} \text{ mol}^{-1}$ |
|---------|--------------------------------------|---------------------|--------------------------------------------------------|----------------------------------------------------------|
| 0       | 0                                    | 1496.687            | 8.09                                                   | 0                                                        |
| 0.01020 | -0.0970                              | 1530.12             | 8.10                                                   | -1.05                                                    |
| 0.01993 | -0.1967                              | 1558.35             | 8.13                                                   | -2.01                                                    |
| 0.02995 | -0.3050                              | 1583.10             | 8.20                                                   | -2.96                                                    |
| 0.04530 | -0.4739                              | 1611.84             | 8.37                                                   | -4.31                                                    |
| 0.05999 | -0.6332                              | 1639.27             | 8.63                                                   | -5.50                                                    |
| 0.07503 | -0.7884                              | 1637.48             | 9.00                                                   | -6.59                                                    |
| 0.09000 | -0.9309                              | 1637.52             | 9.46                                                   | -7.57                                                    |
| 0.1100  | -1.0995                              | 1627.58             | 10.21                                                  | -8.71                                                    |
| 0.1314  | -1.2509                              | 1608.03             | 11.18                                                  | -9.73                                                    |
| 0.1611  | -1.4158                              | 1572.72             | 12.77                                                  | -10.85                                                   |
| 0.1892  | -1.5278                              | 1535.88             | 14.51                                                  | -11.64                                                   |
| 0.2219  | -1.6133                              | 1494.06             | 16.75                                                  | -12.28                                                   |
| 0.2499  | -1.6576                              | 1460.86             | 18.82                                                  | -12.63                                                   |
| 0.2800  | -1.6849                              | 1428.82             | 21.15                                                  | -12.87                                                   |
| 0.3100  | -1.7011                              | 1400.73             | 23.56                                                  | -12.99                                                   |
| 0.3400  | -1.6991                              | 1377.00             | 26.01                                                  | -13.03                                                   |
| 0.3801  | -1.6757                              | 1349.05             | 29.39                                                  | -12.94                                                   |
| 0.4201  | -1.6360                              | 1325.96             | 32.82                                                  | -12.75                                                   |
| 0.4601  | -1.5812                              | 1306.30             | 36.30                                                  | -12.46                                                   |
| 0.5104  | -1.4922                              | 1285.77             | 40.73                                                  | -12.00                                                   |
| 0.5701  | -1.3658                              | 1264.91             | 46.12                                                  | -11.25                                                   |
| 0.6447  | -1.1843                              | 1242.85             | 53.03                                                  | -10.06                                                   |
| 0.7200  | -0.9750                              | 1224.00             | 60.20                                                  | -8.58                                                    |
| 0.7899  | -0.7494                              | 1208.10             | 67.11                                                  | -6.89                                                    |
| 0.8600  | -0.5030                              | 1193.36             | 74.28                                                  | -4.91                                                    |
| 0.9300  | -0.2545                              | 1179.20             | 81.71                                                  | -2.61                                                    |
| 1       | 0                                    | 1165.57             | 89.41                                                  | 0                                                        |

**Table S3** Experimental values of  $V_m^E$ ,  $u$ ,  $K_{S,m} = -(\partial V_m/\partial p)_S$  and of the excess molar quantity  $K_{S,m}^E$  for  $x_A$  diglyme +  $(1 - x_A)$  water at 298.15 K

| $x_A$   | $V_m^E/\text{cm}^3 \text{mol}^{-1}$ | $u/\text{m s}^{-1}$ | $K_{S,m}/\text{m}^3 \text{PPa}^{-1} \text{mol}^{-1}$ | $K_{S,m}^E/\text{m}^3 \text{PPa}^{-1} \text{mol}^{-1}$ |
|---------|-------------------------------------|---------------------|------------------------------------------------------|--------------------------------------------------------|
| 0       | 0                                   | 1496.687            | 8.09                                                 | 0                                                      |
| 0.00503 | -0.0536                             | 1520.18             | 8.09                                                 | -0.52                                                  |
| 0.00999 | -0.1100                             | 1541.50             | 8.09                                                 | -1.03                                                  |
| 0.01505 | -0.1703                             | 1561.32             | 8.12                                                 | -1.52                                                  |
| 0.01998 | -0.2306                             | 1578.89             | 8.15                                                 | -1.98                                                  |
| 0.02498 | -0.2935                             | 1594.79             | 8.20                                                 | -2.44                                                  |
| 0.03001 | -0.3577                             | 1608.89             | 8.27                                                 | -2.88                                                  |
| 0.03497 | -0.4199                             | 1620.86             | 8.35                                                 | -3.29                                                  |
| 0.04001 | -0.4824                             | 1631.33             | 8.45                                                 | -3.69                                                  |
| 0.05006 | -0.6039                             | 1646.83             | 8.70                                                 | -4.43                                                  |
| 0.05497 | -0.6612                             | 1652.30             | 8.84                                                 | -4.77                                                  |
| 0.05996 | -0.7178                             | 1656.10             | 9.00                                                 | -5.10                                                  |
| 0.06497 | -0.7729                             | 1658.81             | 9.17                                                 | -5.41                                                  |
| 0.07008 | -0.8275                             | 1660.43             | 9.36                                                 | -5.71                                                  |
| 0.07505 | -0.8778                             | 1660.70             | 9.57                                                 | -5.99                                                  |
| 0.08000 | -0.9253                             | 1660.04             | 9.78                                                 | -6.25                                                  |
| 0.08488 | -0.9701                             | 1658.68             | 10.00                                                | -6.49                                                  |
| 0.10006 | -1.0976                             | 1650.33             | 10.75                                                | -7.17                                                  |
| 0.10999 | -1.1726                             | 1642.37             | 11.29                                                | -7.56                                                  |
| 0.11994 | -1.2448                             | 1633.08             | 11.86                                                | -7.92                                                  |
| 0.14011 | -1.3768                             | 1611.84             | 13.11                                                | -8.52                                                  |
| 0.17015 | -1.5258                             | 1578.13             | 15.17                                                | -9.19                                                  |
| 0.21003 | -1.6442                             | 1536.32             | 18.16                                                | -9.76                                                  |
| 0.25006 | -1.7378                             | 1499.97             | 21.34                                                | -10.09                                                 |
| 0.28998 | -1.7863                             | 1469.77             | 24.65                                                | -10.23                                                 |
| 0.33001 | -1.7820                             | 1444.01             | 28.11                                                | -10.20                                                 |
| 0.38009 | -1.7444                             | 1418.00             | 32.52                                                | -10.02                                                 |
| 0.44015 | -1.6544                             | 1392.57             | 37.96                                                | -9.61                                                  |
| 0.49994 | -1.5218                             | 1371.69             | 43.52                                                | -9.00                                                  |
| 0.55993 | -1.3580                             | 1354.55             | 49.19                                                | -8.26                                                  |
| 0.61999 | -1.1820                             | 1339.89             | 54.96                                                | -7.39                                                  |
| 0.68007 | -1.0068                             | 1327.10             | 60.80                                                | -6.43                                                  |
| 0.74029 | -0.8381                             | 1315.89             | 66.71                                                | -5.39                                                  |
| 0.79982 | -0.6640                             | 1306.10             | 72.61                                                | -4.29                                                  |
| 0.85953 | -0.4790                             | 1297.19             | 78.60                                                | -3.09                                                  |
| 0.91972 | -0.2802                             | 1289.18             | 84.68                                                | -1.82                                                  |
| 0.96949 | -0.1093                             | 1283.06             | 89.77                                                | -0.71                                                  |
| 1       | 0                                   | 1279.48             | 92.91                                                | 0                                                      |

**Table S4** Experimental values of  $V_m^E$ ,  $u$ ,  $K_{S,m} = -(\partial V_m/\partial p)_S$  and of the excess molar quantity  $K_{S,m}^E$  for  $x_A$  triglyme +  $(1 - x_A)$  water at 298.15 K

| $x_A$   | $V_m^E/\text{cm}^3 \text{ mol}^{-1}$ | $u/\text{m s}^{-1}$ | $K_{S,m}/\text{m}^3 \text{ PPa}^{-1} \text{ mol}^{-1}$ | $K_{S,m}^E/\text{m}^3 \text{ PPa}^{-1} \text{ mol}^{-1}$ |
|---------|--------------------------------------|---------------------|--------------------------------------------------------|----------------------------------------------------------|
| 0       | 0                                    | 1496.687            | 8.09                                                   | 0                                                        |
| 0.00502 | -0.0623                              | 1526.42             | 8.08                                                   | -0.57                                                    |
| 0.01000 | -0.1314                              | 1553.36             | 8.09                                                   | -1.12                                                    |
| 0.01501 | -0.2022                              | 1577.17             | 8.13                                                   | -1.64                                                    |
| 0.02000 | -0.2748                              | 1598.79             | 8.18                                                   | -2.14                                                    |
| 0.02499 | -0.3487                              | 1617.37             | 8.26                                                   | -2.61                                                    |
| 0.03000 | -0.4236                              | 1633.41             | 8.35                                                   | -3.06                                                    |
| 0.03500 | -0.4959                              | 1646.70             | 8.47                                                   | -3.46                                                    |
| 0.03999 | -0.5679                              | 1657.49             | 8.61                                                   | -3.87                                                    |
| 0.04502 | -0.6396                              | 1666.19             | 8.78                                                   | -4.25                                                    |
| 0.05004 | -0.7069                              | 1672.69             | 8.96                                                   | -4.60                                                    |
| 0.05501 | -0.7714                              | 1677.47             | 9.16                                                   | -4.93                                                    |
| 0.05999 | -0.8313                              | 1680.44             | 9.38                                                   | -5.23                                                    |
| 0.06498 | -0.8897                              | 1681.94             | 9.62                                                   | -5.52                                                    |
| 0.06979 | -0.9430                              | 1682.14             | 9.86                                                   | -5.76                                                    |
| 0.08001 | -1.0456                              | 1679.31             | 10.43                                                  | -6.27                                                    |
| 0.09001 | -1.1336                              | 1673.18             | 11.04                                                  | -6.70                                                    |
| 0.10004 | -1.2138                              | 1664.85             | 11.70                                                  | -7.06                                                    |
| 0.11505 | -1.3132                              | 1649.89             | 12.76                                                  | -7.53                                                    |
| 0.13008 | -1.3936                              | 1633.45             | 13.89                                                  | -7.90                                                    |
| 0.14497 | -1.4572                              | 1616.56             | 15.09                                                  | -8.19                                                    |
| 0.15997 | -1.5045                              | 1600.20             | 16.34                                                  | -8.43                                                    |
| 0.17990 | -1.5514                              | 1579.13             | 18.07                                                  | -8.65                                                    |
| 0.20002 | -1.5818                              | 1560.07             | 19.87                                                  | -8.82                                                    |
| 0.22000 | -1.6015                              | 1542.89             | 21.70                                                  | -8.92                                                    |
| 0.23989 | -1.6107                              | 1527.55             | 23.55                                                  | -8.99                                                    |
| 0.27006 | -1.6104                              | 1506.48             | 26.44                                                  | -9.00                                                    |
| 0.30988 | -1.5851                              | 1483.23             | 30.31                                                  | -8.90                                                    |
| 0.36014 | -1.5211                              | 1459.57             | 35.30                                                  | -8.65                                                    |
| 0.41958 | -1.4265                              | 1437.29             | 41.30                                                  | -8.22                                                    |
| 0.48018 | -1.3299                              | 1418.95             | 47.50                                                  | -7.66                                                    |
| 0.53991 | -1.2169                              | 1404.21             | 53.67                                                  | -7.01                                                    |
| 0.60047 | -1.0825                              | 1391.61             | 60.01                                                  | -6.25                                                    |
| 0.66019 | -0.9367                              | 1380.79             | 66.34                                                  | -5.41                                                    |
| 0.71975 | -0.7823                              | 1371.91             | 72.65                                                  | -4.55                                                    |
| 0.77937 | -0.6203                              | 1364.11             | 79.01                                                  | -3.64                                                    |
| 0.84012 | -0.4506                              | 1356.83             | 85.56                                                  | -2.64                                                    |
| 0.90050 | -0.2786                              | 1351.08             | 92.01                                                  | -1.69                                                    |
| 0.93984 | -0.1671                              | 1347.59             | 96.23                                                  | -1.05                                                    |
| 0.97084 | -0.0798                              | 1344.53             | 99.63                                                  | -0.47                                                    |
| 1       | 0                                    | 1342.31             | 102.75                                                 | 0                                                        |

**Table S5** Experimental values of  $V_m^E$ ,  $u$ ,  $K_{S,m} = -(\partial V_m/\partial p)_S$  and of the excess molar quantity  $K_{S,m}^E$  for  $x_A$  tetraglyme +  $(1 - x_A)$  water at 298.15 K

| $x_A$   | $V_m^E/\text{cm}^3 \text{ mol}^{-1}$ | $u/\text{m s}^{-1}$ | $K_{S,m}/\text{m}^3 \text{ PPa}^{-1} \text{ mol}^{-1}$ | $K_{S,m}^E/\text{m}^3 \text{ PPa}^{-1} \text{ mol}^{-1}$ |
|---------|--------------------------------------|---------------------|--------------------------------------------------------|----------------------------------------------------------|
| 0       | 0                                    | 1496.687            | 8.09                                                   | 0                                                        |
| 0.00299 | -0.0430                              | 1518.45             | 8.08                                                   | -0.38                                                    |
| 0.00600 | -0.0900                              | 1539.32             | 8.08                                                   | -0.76                                                    |
| 0.00900 | -0.1395                              | 1558.61             | 8.09                                                   | -1.13                                                    |
| 0.01199 | -0.1902                              | 1576.59             | 8.11                                                   | -1.48                                                    |
| 0.01499 | -0.2413                              | 1592.62             | 8.15                                                   | -1.82                                                    |
| 0.01998 | -0.3267                              | 1616.69             | 8.22                                                   | -2.35                                                    |
| 0.02501 | -0.4123                              | 1637.38             | 8.33                                                   | -2.86                                                    |
| 0.02999 | -0.4964                              | 1654.09             | 8.47                                                   | -3.33                                                    |
| 0.03495 | -0.5790                              | 1667.50             | 8.64                                                   | -3.76                                                    |
| 0.03996 | -0.6596                              | 1678.05             | 8.83                                                   | -4.17                                                    |
| 0.04499 | -0.7369                              | 1685.76             | 9.05                                                   | -4.54                                                    |
| 0.05000 | -0.8102                              | 1691.08             | 9.30                                                   | -4.89                                                    |
| 0.05495 | -0.8787                              | 1694.55             | 9.56                                                   | -5.21                                                    |
| 0.05997 | -0.9438                              | 1695.92             | 9.85                                                   | -5.51                                                    |
| 0.06493 | -1.0042                              | 1695.50             | 10.17                                                  | -5.78                                                    |
| 0.06991 | -1.0610                              | 1694.04             | 10.49                                                  | -6.03                                                    |
| 0.07994 | -1.1633                              | 1688.11             | 11.21                                                  | -6.47                                                    |
| 0.08992 | -1.2505                              | 1679.32             | 11.98                                                  | -6.85                                                    |
| 0.09984 | -1.3237                              | 1668.56             | 12.80                                                  | -7.16                                                    |
| 0.10983 | -1.3858                              | 1667.38             | 13.66                                                  | -7.43                                                    |
| 0.12489 | -1.4612                              | 1640.01             | 15.02                                                  | -7.76                                                    |
| 0.13993 | -1.5188                              | 1622.96             | 16.45                                                  | -8.01                                                    |
| 0.15969 | -1.5696                              | 1601.56             | 18.40                                                  | -8.25                                                    |
| 0.17955 | -1.5887                              | 1582.25             | 20.44                                                  | -8.40                                                    |
| 0.19953 | -1.5963                              | 1565.02             | 22.52                                                  | -8.49                                                    |
| 0.21951 | -1.5967                              | 1549.50             | 24.65                                                  | -8.54                                                    |
| 0.23934 | -1.5927                              | 1535.82             | 26.79                                                  | -8.55                                                    |
| 0.26932 | -1.5738                              | 1517.52             | 30.08                                                  | -8.49                                                    |
| 0.30919 | -1.5295                              | 1497.36             | 34.51                                                  | -8.33                                                    |
| 0.35881 | -1.4558                              | 1477.30             | 40.10                                                  | -8.02                                                    |
| 0.41878 | -1.3488                              | 1458.03             | 46.94                                                  | -7.52                                                    |
| 0.47783 | -1.2279                              | 1443.02             | 53.75                                                  | -6.94                                                    |
| 0.53721 | -1.1052                              | 1430.63             | 60.65                                                  | -6.28                                                    |
| 0.59738 | -0.9540                              | 1420.47             | 67.67                                                  | -5.56                                                    |
| 0.65639 | -0.8083                              | 1411.54             | 74.64                                                  | -4.77                                                    |
| 0.71594 | -0.6704                              | 1404.21             | 81.64                                                  | -3.98                                                    |
| 0.77552 | -0.5190                              | 1397.94             | 88.67                                                  | -3.16                                                    |
| 0.83391 | -0.3638                              | 1393.31             | 95.48                                                  | -2.44                                                    |
| 0.89314 | -0.2129                              | 1388.45             | 102.49                                                 | -1.58                                                    |
| 0.93246 | -0.1219                              | 1385.23             | 107.19                                                 | -0.97                                                    |
| 0.96158 | -0.0631                              | 1382.78             | 110.70                                                 | -0.49                                                    |
| 0.99204 | -0.0116                              | 1381.11             | 114.23                                                 | -0.12                                                    |
| 1       | 0                                    | 1380.56             | 115.18                                                 | 0                                                        |

## Appendix S1. Summary of four-segment model equations

### Water-rich segment (subscript w)

$$Q_m^E(w) = a_w(x_A - x_A^3) + b_w(x_A^2 - x_A^3) + c_w x_A^3 \quad (\text{w1s})$$

$$dQ_m^E/dx_A(w) = a_w(1 - 3x_A^2) + b_w(2x_A - 3x_A^2) + 3c_w x_A^2 \quad (\text{w2s})$$

$$Q_A^E(w) = a_w(1 - x_A)^2(1 + 2x_A) + 2b_w x_A(1 - x_A)^2 + c_w(3x_A^2 - 2x_A^3) \quad (\text{w3s})$$

$$Q_W^E(w) = 2a_w x_A^3 - b_w(x_A^2 - 2x_A^3) - 2c_w x_A^3 \quad (\text{w4s})$$

$$Q_{\phi,A}^E(w) = a_w(1 - x_A^2) + b_w(x_A - x_A^2) + c_w x_A^2 \quad (\text{w5s})$$

$$Q_{\phi,W}^E(w) = a_w(x_A + x_A^2) + b_w x_A^2 + c_w x_A^3/(1 - x_A) \quad (\text{w6s})$$

$$(Q_m^E)_R(w) = a_w(1 + x_A) + b_w x_A + c_w x_A^2/(1 - x_A) \quad (\text{w7s})$$

$$d^2Q_m^E(w)/dx_A^2 = -6a_w x_A + 2b_w(1 - 3x_A) + 6c_w x_A \quad (\text{w8s})$$

### Transitional segment (eight-parameter version, subscript T)

$$\begin{aligned} Q_m^E(T) = & Q_m^E(w, x_1)(4f_T^3 - 3f_T^4) + Q_m^E(L, x_2)(1 - 4f_T^3 + 3f_T^4) \\ & + (x_2 - x_1)[dQ_m^E(w, x_1)/dx_A](f_T^3 - f_T^4) \\ & - (x_2 - x_1)[dQ_m^E(L, x_2)/dx_A](f_T - 3f_T^3 + 2f_T^4) - b_T(f_T^2 - 2f_T^3 + f_T^4) \end{aligned} \quad (\text{T1s})$$

$$\begin{aligned} dQ_m^E(T)/dx_A = & -12[Q_m^E(w, x_1) - Q_m^E(L, x_2)](f_T^2 - f_T^3)/(x_2 - x_1) \\ & - [dQ_m^E(w, x_1)/dx_A](3f_T^2 - 4f_T^3) + [dQ_m^E(L, x_2)/dx_A](1 - 9f_T^2 + 8f_T^3) \\ & + 2b_T(f_T - 3f_T^2 + 2f_T^3)/(x_2 - x_1) \end{aligned} \quad (\text{T2s})$$

$$\begin{aligned} Q_A^E(T) = & Q_m^E(w, x_1)[4f_T^3 - 3f_T^4 - 12(1 - x_A)(f_T^2 - f_T^3)/(x_2 - x_1)] \\ & + Q_m^E(L, x_2)[1 - 4f_T^3 + 3f_T^4 + 12(1 - x_A)(f_T^2 - f_T^3)/(x_2 - x_1)] \\ & + [dQ_m^E(w, x_1)/dx_A][(x_2 - x_1)(f_T^3 - f_T^4) - (1 - x_A)(3f_T^2 - 4f_T^3)] \\ & - [dQ_m^E(L, x_2)/dx_A][(x_2 - x_1)(f_T - 3f_T^3 + 2f_T^4) - (1 - x_A)(1 - 9f_T^2 + 8f_T^3)] \\ & - b_T[(f_T^2 - 2f_T^3 + f_T^4) - 2(1 - x_A)(f_T - 3f_T^2 + 2f_T^3)/(x_2 - x_1)] \end{aligned} \quad (\text{T3s})$$

$$\begin{aligned} Q_W^E(T) = & Q_m^E(w, x_1)[4f_T^3 - 3f_T^4 + 12x_A(f_T^2 - f_T^3)/(x_2 - x_1)] \\ & + Q_m^E(L, x_2)[1 - 4f_T^3 + 3f_T^4 - 12x_A(f_T^2 - f_T^3)/(x_2 - x_1)] \\ & + [dQ_m^E(w, x_1)/dx_A][(x_2 - x_1)(f_T^3 - f_T^4) + x_A(3f_T^2 - 4f_T^3)] \\ & - [dQ_m^E(L, x_2)/dx_A][(x_2 - x_1)(f_T - 3f_T^3 + 2f_T^4) + x_A(1 - 9f_T^2 + 8f_T^3)] \\ & - b_T[f_T^2 - 2f_T^3 + f_T^4 + 2x_A(f_T - 3f_T^2 + 2f_T^3)/(x_2 - x_1)] \end{aligned} \quad (\text{T4s})$$

$$\begin{aligned}
 Q_{\phi,A}^E(T) = & \{Q_m^E(w,x_1)(4f_T^3 - 3f_T^4) + Q_m^E(L,x_2)(1 - 4f_T^3 + 3f_T^4) \\
 & + (x_2 - x_1)[dQ_m^E(w,x_1)/dx_A](f_T^3 - f_T^4) \\
 & - (x_2 - x_1)[dQ_m^E(L,x_2)/dx_A](f_T - 3f_T^3 + 2f_T^4) - b_T(f_T^2 - 2f_T^3 + f_T^4)\}/x_A \quad (T5s)
 \end{aligned}$$

$$\begin{aligned}
 Q_{\phi,W}^E(T) = & \{Q_m^E(w,x_1)(4f_T^3 - 3f_T^4) + Q_m^E(L,x_2)(1 - 4f_T^3 + 3f_T^4) \\
 & + (x_2 - x_1)[dQ_m^E(w,x_1)/dx_A](f_T^3 - f_T^4) \\
 & - (x_2 - x_1)[dQ_m^E(L,x_2)/dx_A](f_T - 3f_T^3 + 2f_T^4) \\
 & - b_T(f_T^2 - 2f_T^3 + f_T^4)\}/(1 - x_A) \quad (T6s)
 \end{aligned}$$

$$\begin{aligned}
 (Q_m^E)_R(T) = & \{Q_m^E(w,x_1)(4f_T^3 - 3f_T^4) + Q_m^E(L,x_2)(1 - 4f_T^3 + 3f_T^4) \\
 & + (x_2 - x_1)[dQ_m^E(w,x_1)/dx_A](f_T^3 - f_T^4) \\
 & - (x_2 - x_1)[dQ_m^E(L,x_2)/dx_A](f_T - 3f_T^3 + 2f_T^4) \\
 & - b_T(f_T^2 - 2f_T^3 + f_T^4)\}/[x_A(1 - x_A)] \quad (T7s)
 \end{aligned}$$

$$\begin{aligned}
 d^2Q_m^E(T)/dx_A^2 = & 12[Q_m^E(w,x_1) - Q_m^E(L,x_2)](2f_T - 3f_T^2)/(x_2 - x_1)^2 \\
 & + 6[dQ_m^E(w,x_1)/dx_A](f_T - 2f_T^2)/(x_2 - x_1) \\
 & + 6[dQ_m^E(L,x_2)/dx_A](3f_T - 4f_T^2)/(x_2 - x_1) \\
 & - 2b_T[1 - 6f_T + 6f_T^2]/(x_2 - x_1)^2 \quad (T8s)
 \end{aligned}$$

where:

$$f_T = (x_2 - x_A)/(x_2 - x_1)$$

$$Q_m^E(w,x_1) = a_w(x_1 - x_1^3) + b_w(x_1^2 - x_1^3) + c_w x_1^3$$

$$dQ_m^E(w,x_1)/dx_A = a_w(1 - 3x_1^2) + b_w(2x_1 - 3x_1^2) + 3c_w x_1^2$$

$$Q_m^E(L,x_2) = q_A x_2 + q_W(1 - x_2) + b_L x_2(1 - x_2)$$

$$dQ_m^E(L,x_2)/dx_A = q_A - q_W + b_L(1 - 2x_2)$$

### Transitional segment (nine-parameter version, subscript T)

$$\begin{aligned}
 Q_m^E(T) = & Q_m^E(w,x_1)f_T^4 + Q_m^E(L,x_2)(1 - f_T^4) \\
 & - (x_2 - x_1)[dQ_m^E(L,x_2)/dx_A](f_T - f_T^4) - b_T(f_T^2 - f_T^4) - c_T(f_T^3 - f_T^4) \quad (T1a)
 \end{aligned}$$

$$\begin{aligned}
 dQ_m^E(T)/dx_A = & -4[Q_m^E(w,x_1) - Q_m^E(L,x_2)]f_T^3/(x_2 - x_1) \\
 & + [dQ_m^E(L,x_2)/dx_A](1 - 4f_T^3)
 \end{aligned}$$



$$+ [2b_T(f_T - 2f_T^3) + c_T(3f_T^2 - 4f_T^3)]/(x_2 - x_1) \quad (\text{T2a})$$

$$\begin{aligned} Q_A^E(\text{T}) = & Q_m^E(\text{w},x_1)[f_T^4 - 4(1 - x_A)f_T^3/(x_2 - x_1)] \\ & + Q_m^E(\text{L},x_2)[1 - f_T^4 + 4(1 - x_A)f_T^3/(x_2 - x_1)] \\ & - [dQ_m^E(\text{L},x_2)/dx_A][(x_2 - x_1)(f_T - f_T^4) - (1 - x_A)(1 - 4f_T^3)] \\ & - b_T[f_T^2 - f_T^4 - 2(1 - x_A)(f_T - 2f_T^3)/(x_2 - x_1)] \\ & - c_T[f_T^3 - f_T^4 - (1 - x_A)(3f_T^2 - 4f_T^3)/(x_2 - x_1)] \end{aligned} \quad (\text{T3a})$$

$$\begin{aligned} Q_W^E(\text{T}) = & Q_m^E(\text{w},x_1)[f_T^4 + 4x_Af_T^3/(x_2 - x_1)] + Q_m^E(\text{L},x_2)[1 - f_T^4 - 4x_Af_T^3/(x_2 - x_1)] \\ & - [dQ_m^E(\text{L},x_2)/dx_A][(x_2 - x_1)(f_T - f_T^4) + x_A(1 - 4f_T^3)] \\ & - b_T[f_T^2 - f_T^4 + 2x_A(f_T - 2f_T^3)/(x_2 - x_1)] \\ & - c_T[f_T^3 - f_T^4 + x_A(3f_T^2 - 4f_T^3)/(x_2 - x_1)] \end{aligned} \quad (\text{T4a})$$

The apparent excess molar properties are:

$$\begin{aligned} Q_{\phi,A}^E(\text{T}) = & \{Q_m^E(\text{w},x_1)f_T^4 + Q_m^E(\text{L},x_2)(1 - f_T^4) - (x_2 - x_1)[dQ_m^E(\text{L},x_2)/dx_A](f_T - f_T^4) \\ & - b_T(f_T^2 - f_T^4) - c_T(f_T^3 - f_T^4)\}/x_A \end{aligned} \quad (\text{T5a})$$

$$\begin{aligned} Q_{\phi,W}^E(\text{T}) = & \{Q_m^E(\text{w},x_1)f_T^4 + Q_m^E(\text{L},x_2)(1 - f_T^4) - (x_2 - x_1)[dQ_m^E(\text{L},x_2)/dx_A](f_T - f_T^4) \\ & - b_T(f_T^2 - f_T^4) - c_T(f_T^3 - f_T^4)\}/(1 - x_A) \end{aligned} \quad (\text{T6a})$$

The reduced excess molar properties are given by:

$$\begin{aligned} (Q_m^E)_R(\text{T}) = & \{Q_m^E(\text{w},x_1)f_T^4 + Q_m^E(\text{L},x_2)(1 - f_T^4) - (x_2 - x_1)[dQ_m^E(\text{L},x_2)/dx_A](f_T - f_T^4) \\ & - b_T(f_T^2 - f_T^4) - c_T(f_T^3 - f_T^4)\}/[x_A(1 - x_A)] \end{aligned} \quad (\text{T7a})$$

$$\begin{aligned} d^2Q_m^E(\text{T})/dx_A^2 = & 12[Q_m^E(\text{w},x_1) - Q_m^E(\text{L},x_2)]f_T^2/(x_2 - x_1)^2 \\ & + 12[dQ_m^E(\text{L},x_2)/dx_A]f_T^2/(x_2 - x_1) \\ & - [2b_T(1 - 6f_T^2) + 6c_T(f_T - 2f_T^2)]/(x_2 - x_1)^2 \end{aligned} \quad (\text{T8a})$$

### Pseudolamellar segment (subscript L)

$$Q_m^E(\text{L}) = q_Ax_A + q_W(1 - x_A) + b_Lx_A(1 - x_A) \quad (\text{L1s})$$

$$dQ_m^E(\text{L})/dx_A = q_A - q_W + b_L(1 - 2x_A) \quad (\text{L2s})$$

$$Q_A^E(\text{L}) = q_A + b_L(1 - x_A)^2 \quad (\text{L3s})$$

$$Q_W^E(\text{L}) = q_W + b_Lx_A^2 \quad (\text{L4s})$$

$$Q_{\phi,A}^E(L) = q_A + q_W(1 - x_A)/x_A + b_L(1 - x_A) \quad (\text{L5s})$$

$$Q_{\phi,W}^E(L) = q_A x_A/(1 - x_A) + q_W + b_L x_A \quad (\text{L6s})$$

$$(Q_m^E)_R(L) = q_A/(1 - x_A) + q_W/x_A + b_L \quad (\text{L7s})$$

$$d^2 Q_m^E(L)/dx_A^2 = -2b_L \quad (\text{L8s})$$

### Amphiphile-rich segment (subscript a)

$$Q_m^E(a) = a_a x_W(1 - 2f_a + f_a^2) + [dQ_m^E(L, x_3)/dx_A] x_W(f_a - f_a^2) + Q_m^E(L, x_3)(3f_a^2 - 2f_a^3) \quad (\text{a1s})$$

$$dQ_m^E(a)/dx_A = -a_a(1 - 4f_a + 3f_a^2) - [dQ_m^E(L, x_3)/dx_A](2f_a - 3f_a^2) - 6Q_m^E(L, x_3)(f_a - f_a^2)/(1 - x_3) \quad (\text{a2s})$$

$$Q_A^E(a) = 2a_a x_W(f_a - f_a^2) - [dQ_m^E(L, x_3)/dx_A] x_W(f_a - 2f_a^2) - Q_m^E(L, x_3)(3f_a^2 - 4f_a^3) \quad (\text{a3s})$$

$$Q_W^E(a) = a_a[1 - 4f_a + 3f_a^2 + 2x_W(f_a - f_a^2)] + [dQ_m^E(L, x_3)/dx_A][2f_a - 3f_a^2 - x_W(f_a - 2f_a^2)] - Q_m^E(L, x_3)[3f_a^2 - 4f_a^3 - 6(f_a - f_a^2)/(1 - x_3)] \quad (\text{a4s})$$

$$Q_{\phi,A}^E(a) = a_a x_W(1 - 2f_a + f_a^2)/(1 - x_W) + [dQ_m^E(L, x_3)/dx_A] x_W(f_a - f_a^2)/(1 - x_W) + Q_m^E(L, x_3)(3f_a^2 - 2f_a^3)/(1 - x_W) \quad (\text{a5s})$$

$$Q_{\phi,W}^E(a) = a_a(1 - 2f_a + f_a^2) + [dQ_m^E(L, x_3)/dx_A](f_a - f_a^2) + Q_m^E(L, x_3)(3f_a^2 - 2f_a^3)/x_W \quad (\text{a6s})$$

$$(Q_m^E)_R(a) = a_a(1 - 2f_a + f_a^2)/(1 - x_W) + [dQ_m^E(L, x_3)/dx_A](f_a - f_a^2)/(1 - x_W) + Q_m^E(L, x_3)(3f_a^2 - 2f_a^3)/[x_W(1 - x_W)] \quad (\text{a7s})$$

$$d^2 Q_m^E(a)/dx_A^2 = -2a_a(2 - 3f_a)/(1 - x_3) + 2[dQ_m^E(L, x_3)/dx_A](1 - 3f_a)/(1 - x_3) + 6Q_m^E(L, x_3)[1 - 2f_a]/(1 - x_3)^2 \quad (\text{a8s})$$

where:

$$f_a = x_W/(1 - x_3)$$

$$Q_m^E(L, x_3) = q_A x_3 + q_W(1 - x_3) + b_L x_3(1 - x_3)$$

$$dQ_m^E(L, x_3)/dx_A = q_A - q_W + b_L(1 - 2x_3)$$

## Appendix S2. Equations of the single-association ideal mass-action model grafted into the four-segment model scheme

Various suggestions have been put forward to describe quasi-chemical equilibria involving aggregates that are formed by amphiphile molecules in aqueous environment.

A model in which there were two types of amphiphile hydrates, hydrophilic and hydrophobic was described. The two types of hydration water were treated as being in equilibrium with each other and with the bulk water.<sup>42,43</sup>

Another mass-action model in which the amphiphile monomers are in equilibrium with oligomeric amphiphile clusters was proposed.<sup>44</sup> This model has proved to be useful in several respects, even for species which are obviously non-micelle forming.

The basic equilibrium is represented by:

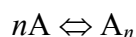

where  $n$  is the aggregation number of the oligomer.

We can write an equilibrium constant expression of the type:

$$K = \alpha_n / \alpha_1^n \quad (\text{A2. 1})$$

where  $\alpha_n$  and  $\alpha_1$  are the respective activities of the ( $n$ -mer) oligomer and the amphiphile monomer.

At some amphiphile mole fraction  $x_A$ , a large fraction,  $f$ , of the amphiphile molecules remains in the monomeric state. We may chose to represent the two activities by:

$$\alpha_n = x_A (1 - f)/n \quad (\text{A2. 2})$$

and

$$\alpha_1 = x_A f \quad (\text{A2. 3})$$

This treats each of the hydrated solute species as though ideal. It gives:

$$K = x_A (1 - f) n^{-1} / (x_A f)^n \quad (\text{A2. 4})$$

From eqn. (A2. 4), we can derive:

$$\Delta G_n^0 / RT = - \ln K = n \ln f - \ln (1 - f) + (n - 1) \ln x_A + \ln n \quad (\text{A2. 5})$$

where  $\Delta G_n^0$  is the standard Gibbs energy for the formation of one mole of micelles, from the monomeric molecules. The standard states of both monomer and micelle are Henry's law states; that is to say unit mole fractions but enthalpies corresponding to a totally solvent (aqueous) environment.

It turns out that it is more convenient to work with  $\Delta G_1^0$ , which is the same quantity *per* mole of monomers.

$$\Delta G_1^0/RT = \ln f - n^{-1} \ln(1-f) - [(n-1)/n] \ln x_A + n^{-1} \ln n \quad (\text{A2. 6})$$

Equation (A2. 6) provides us with a means of determining the monomer fraction,  $f$ , for a given combination of  $x_A$ ,  $\Delta G_1^0/RT$  and  $n$ . Solving this equation for  $f$  is by no means a simple exercise, calling for some type of successive approximation technique.

Having obtained values of  $f$  for each of the mole fractions,  $x_A$ , for which data points are available, it is possible to analyse the excess apparent, excess reduced and excess molar property data.

The simplest analytic equation is:

$$Q_{\phi,A}^E = f a_{\text{mono}} + (1-f) a_{\text{mic}} \quad (\text{A2. 7})$$

where  $a_{\text{mono}}$  and  $a_{\text{mic}}$  are the apparent excess molar properties of the monomer and micellar aggregate, at infinite dilution, respectively. In the latter case, the molar value is per unit of amphiphile. In other notation,  $a_{\text{mic}} = a_n/n$ .

This equation does not have sufficient flexibility for all of the data sets that we have had occasion to analyse, with this type of model. As it stands, the model ignores all types of solute–solute interaction other than those giving rise to cluster formation. The simplest of the solute–solute interactions require terms that are quadratic in mole fraction for  $Q_m^E$ . We have chosen to expand eqn. (A2. 7) in the form:

$$Q_{\phi,A}^E = f a_{\text{mono}} + (1-f) a_{\text{mic}} + b f^2 x_A \quad (\text{A2. 8})$$

This equation is not totally satisfactory but it shows about as much flexibility as the vast majority of data sets could warrant.

It is possible to incorporate this version of the mass action model into the four-segment model scheme. Eqn. (A2. 8) replaces the original water-rich segment eqn. (w5s) in Appendix S1:

$$Q_{\phi,A}^E(\text{w}) = a_w(1-x_A^2) + b_w(x_A - x_A^2) + c_w x_A^2 \quad (\text{w5s})$$

The new water-rich segment extends up to a new version of the segment junction  $x_1$ .

The remaining equations are:

$$Q_m^E(\text{ma}) = [f a_{\text{mono}} + (1-f) a_{\text{mic}}] x_A + b f^2 x_A^2 \quad (\text{ma1})$$

$$\begin{aligned} dQ_m^E(\text{ma})/dx_A = & f a_{\text{mono}} + (1-f) a_{\text{mic}} + 2 b f^2 x_A \\ & + x_A (a_{\text{mono}} - a_{\text{mic}}) df/dx_A + 2 b f x_A^2 df/dx_A \end{aligned}$$

We can obtain an expression for  $df/dx_A$  from:

$$\begin{aligned}\Delta G_1^{\circ}/RT &= \ln f - n^{-1} \ln(1-f) + [(n-1)/n] \ln x_A + n^{-1} \ln n \\ 0 &= d \ln f/dx_A - n^{-1} d \ln(1-f)/dx_A + [(n-1)/n] d \ln x_A/dx_A \\ 0 &= f^{-1} df/dx_A + n^{-1} (1-f)^{-1} df/dx_A + [(n-1)/n] x_A^{-1} \\ df/dx_A &= - [(n-1)/n] x_A^{-1} / [f^{-1} + n^{-1}(1-f)^{-1}] \\ &= - [(n-1)/n] [nf(1-f)] x_A^{-1} [n - (n-1)f]^{-1} \\ &= - (n-1)f(1-f) x_A^{-1} [n - (n-1)f]^{-1} \\ dQ_m^E(\text{ma})/dx_A &= f a_{\text{mono}} + (1-f) a_{\text{mic}} + 2 b f^2 x_A \\ &\quad - (a_{\text{mono}} - a_{\text{mic}} + 2 b f x_A) (n-1)f(1-f)/[n - (n-1)f]\end{aligned}\quad (\text{ma2})$$

Since

$$\begin{aligned}Q_A^E &= Q_m^E + (1-x_A) dQ_m^E/dx_A \\ Q_A^E(\text{ma}) &= f a_{\text{mono}} + (1-f) a_{\text{mic}} + 2 b f^2 x_A - b f^2 x_A^2 \\ &\quad - (1-x_A) (a_{\text{mono}} - a_{\text{mic}} + 2 b f x_A) (n-1)f(1-f)/[n - (n-1)f]\end{aligned}\quad (\text{ma3})$$

Since

$$\begin{aligned}Q_W^E &= Q_m^E - x_A dQ_m^E/dx_A \\ Q_W^E(\text{ma}) &= - b f^2 x_A^2 - x_A (a_{\text{mono}} - a_{\text{mic}} + 2 b f x_A) (n-1)f(1-f)/[n - (n-1)f]\end{aligned}\quad (\text{ma4})$$

The apparent molar excess properties are given by:

$$Q_{\phi,A}^E(\text{ma}) = f a_{\text{mono}} + (1-f) a_{\text{mic}} + b f^2 x_A \quad (\text{ma5})$$

$$Q_{\phi,W}^E(\text{ma}) = [f a_{\text{mono}} + (1-f) a_{\text{mic}}] x_A / (1-x_A) + b f^2 x_A^2 / (1-x_A) \quad (\text{ma6})$$

The reduced excess molar properties are given by:

$$(Q_m^E)_R(\text{ma}) = [f a_{\text{mono}} + (1-f) a_{\text{mic}}] / (1-x_A) + b f^2 x_A / (1-x_A) \quad (\text{ma7})$$
